# Supplementary material for: An improved route to 19-substituted geldanamycins as novel Hsp90 inhibitors – potential therapeutics in cancer and neurodegeneration
Source: Royal Society of Chemistry journal article supplement (doi:10.1039/c3cc43457e), 2013-01-01

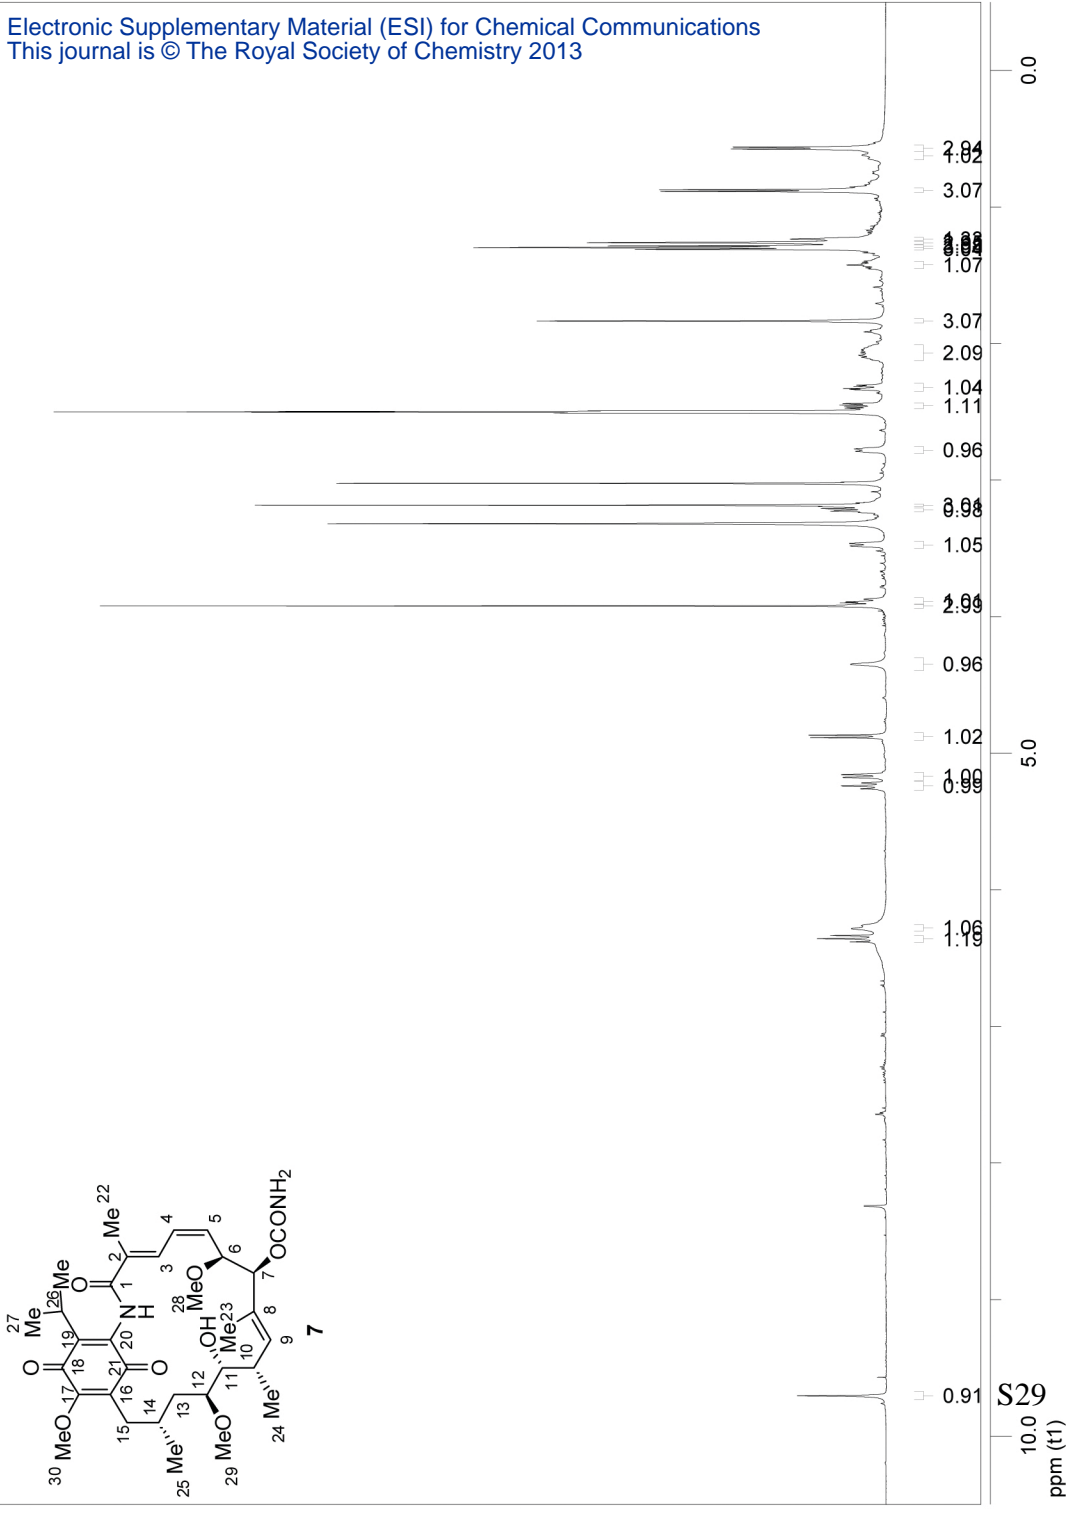

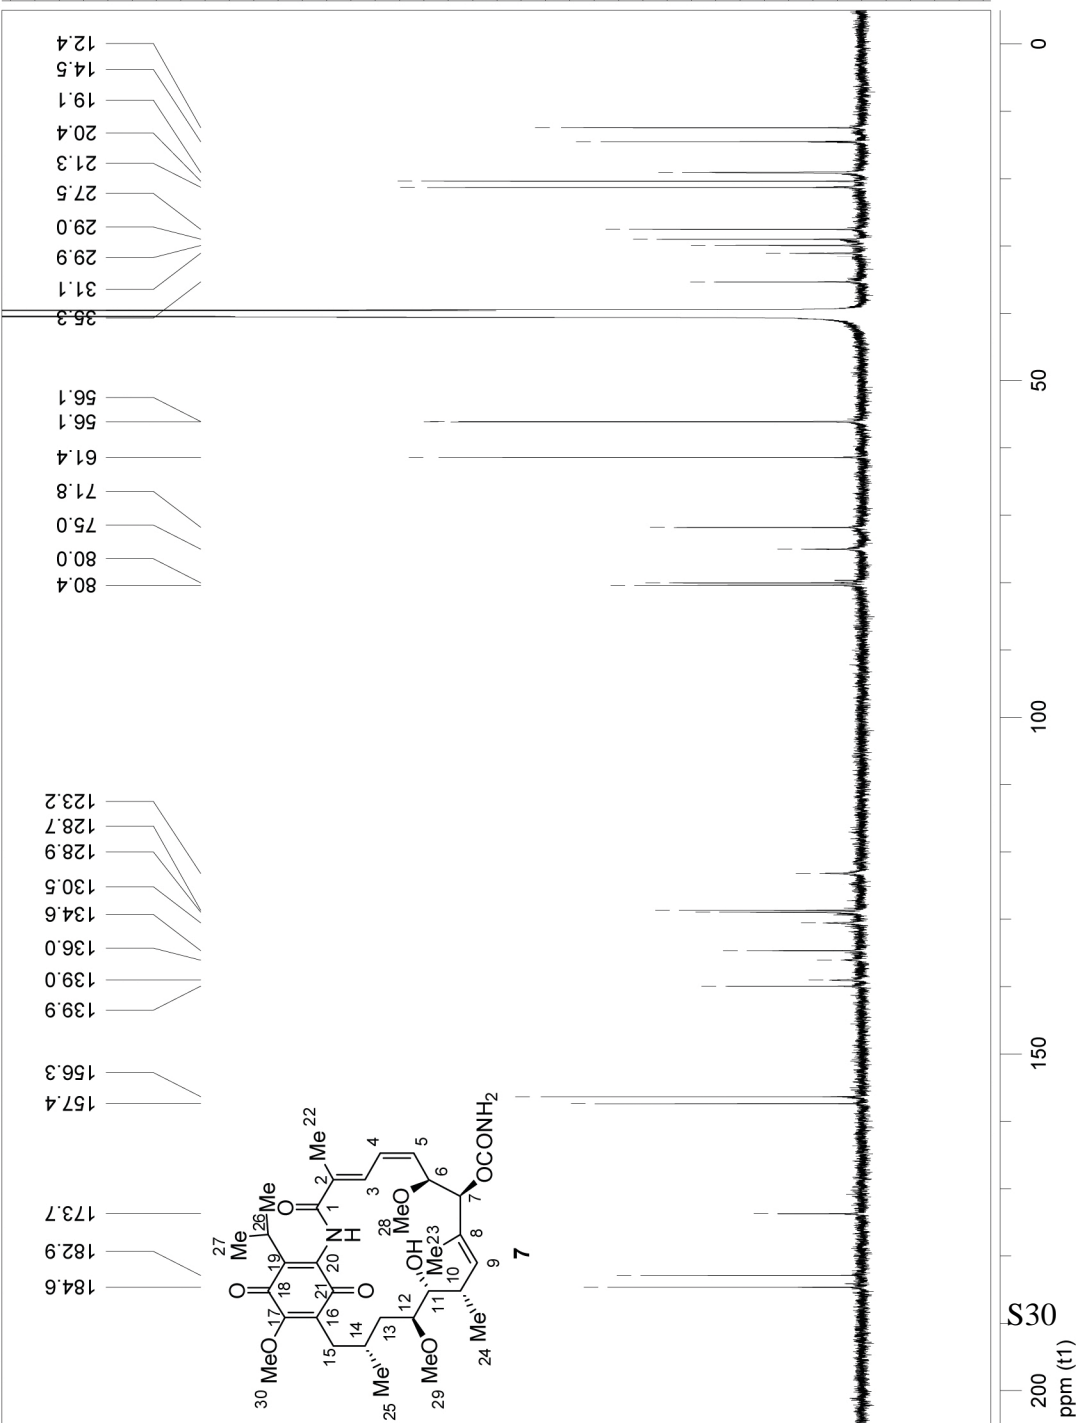

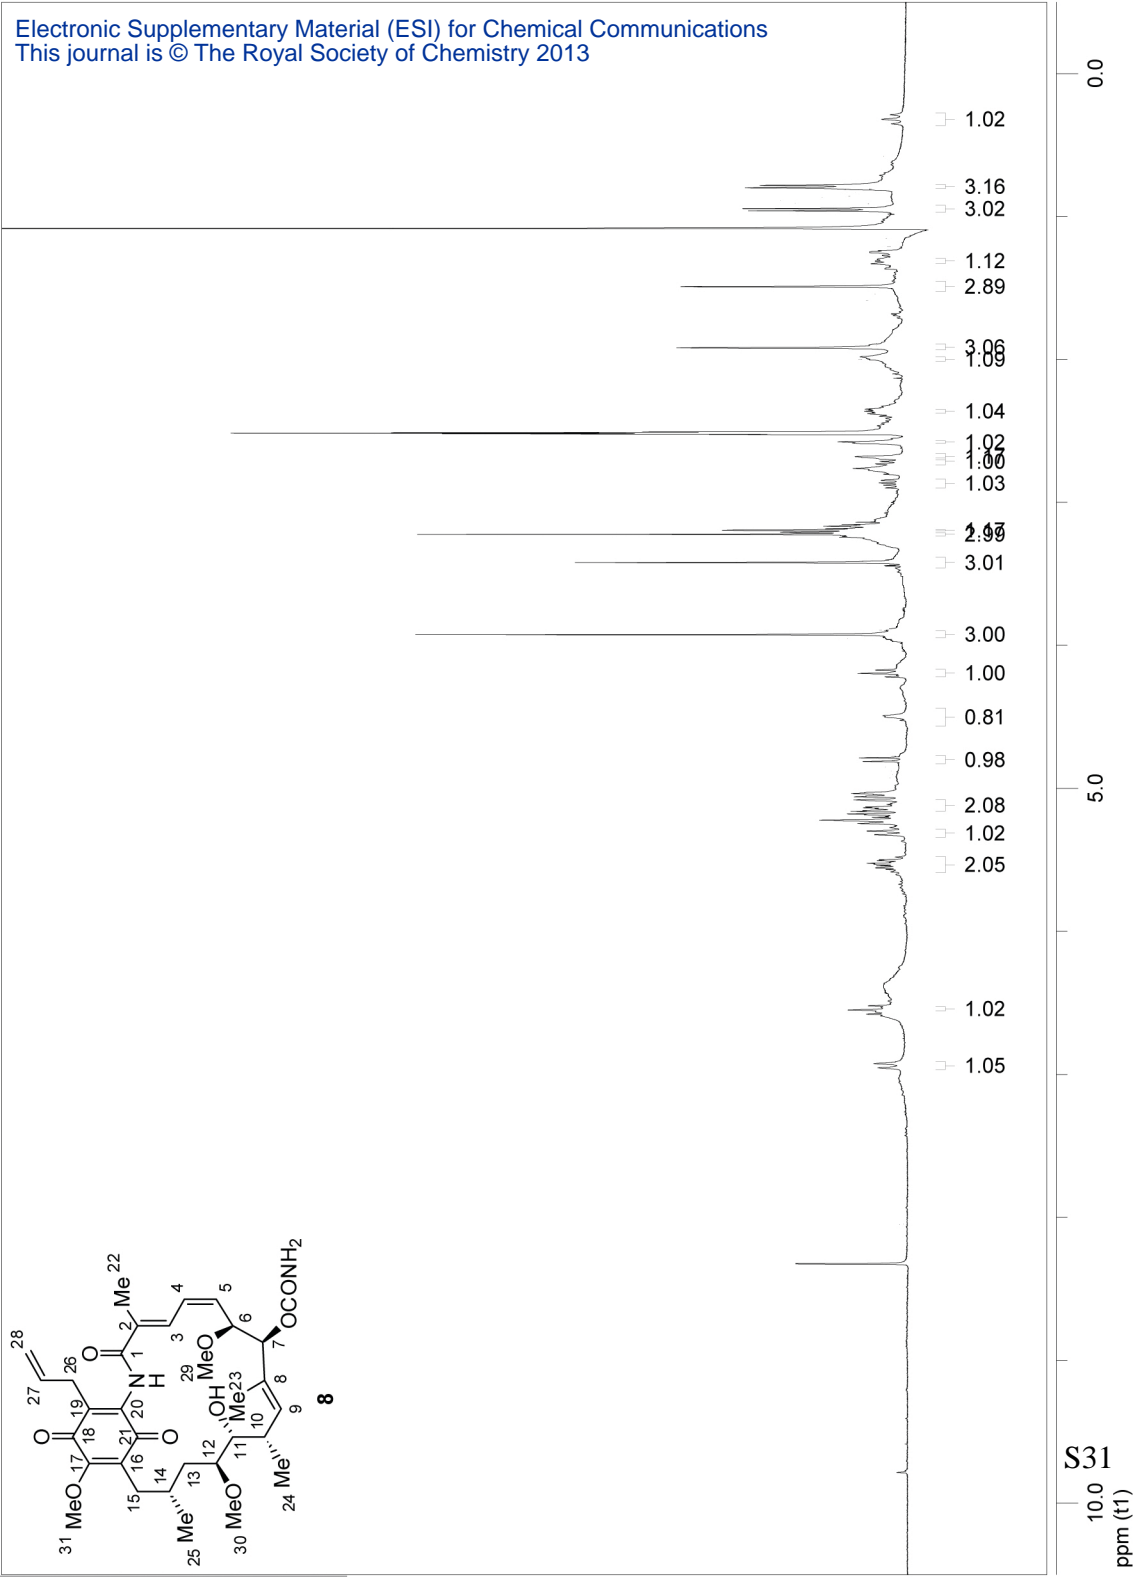

S31

10.0

ppm ( $\tau$ )

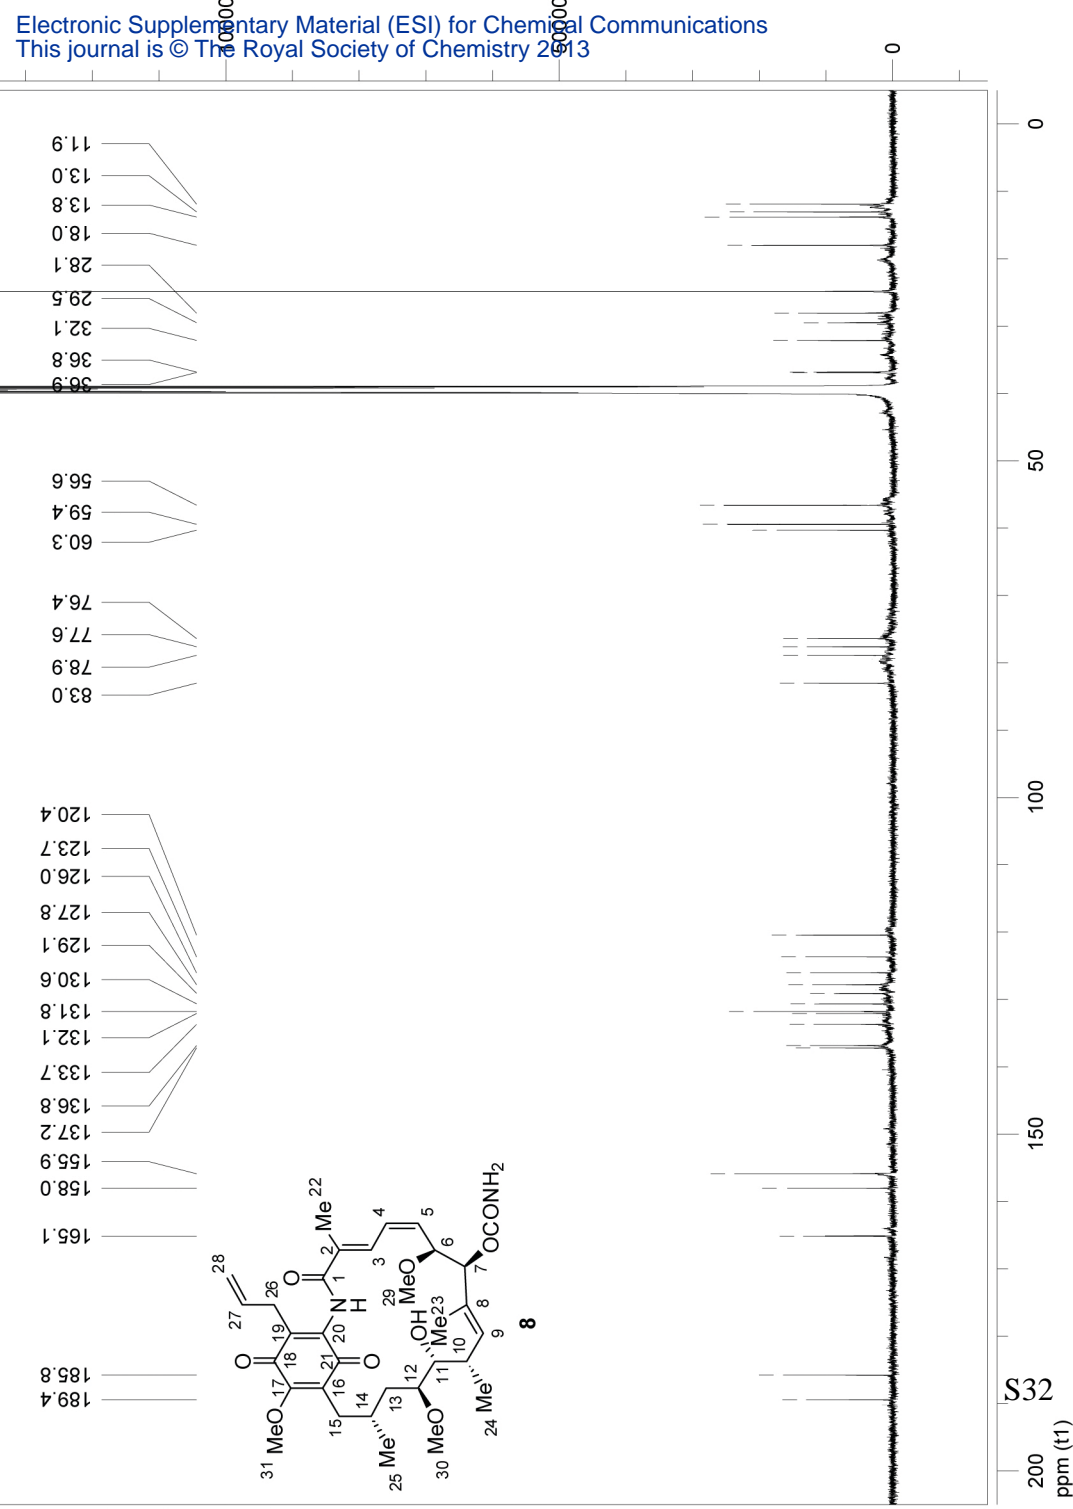

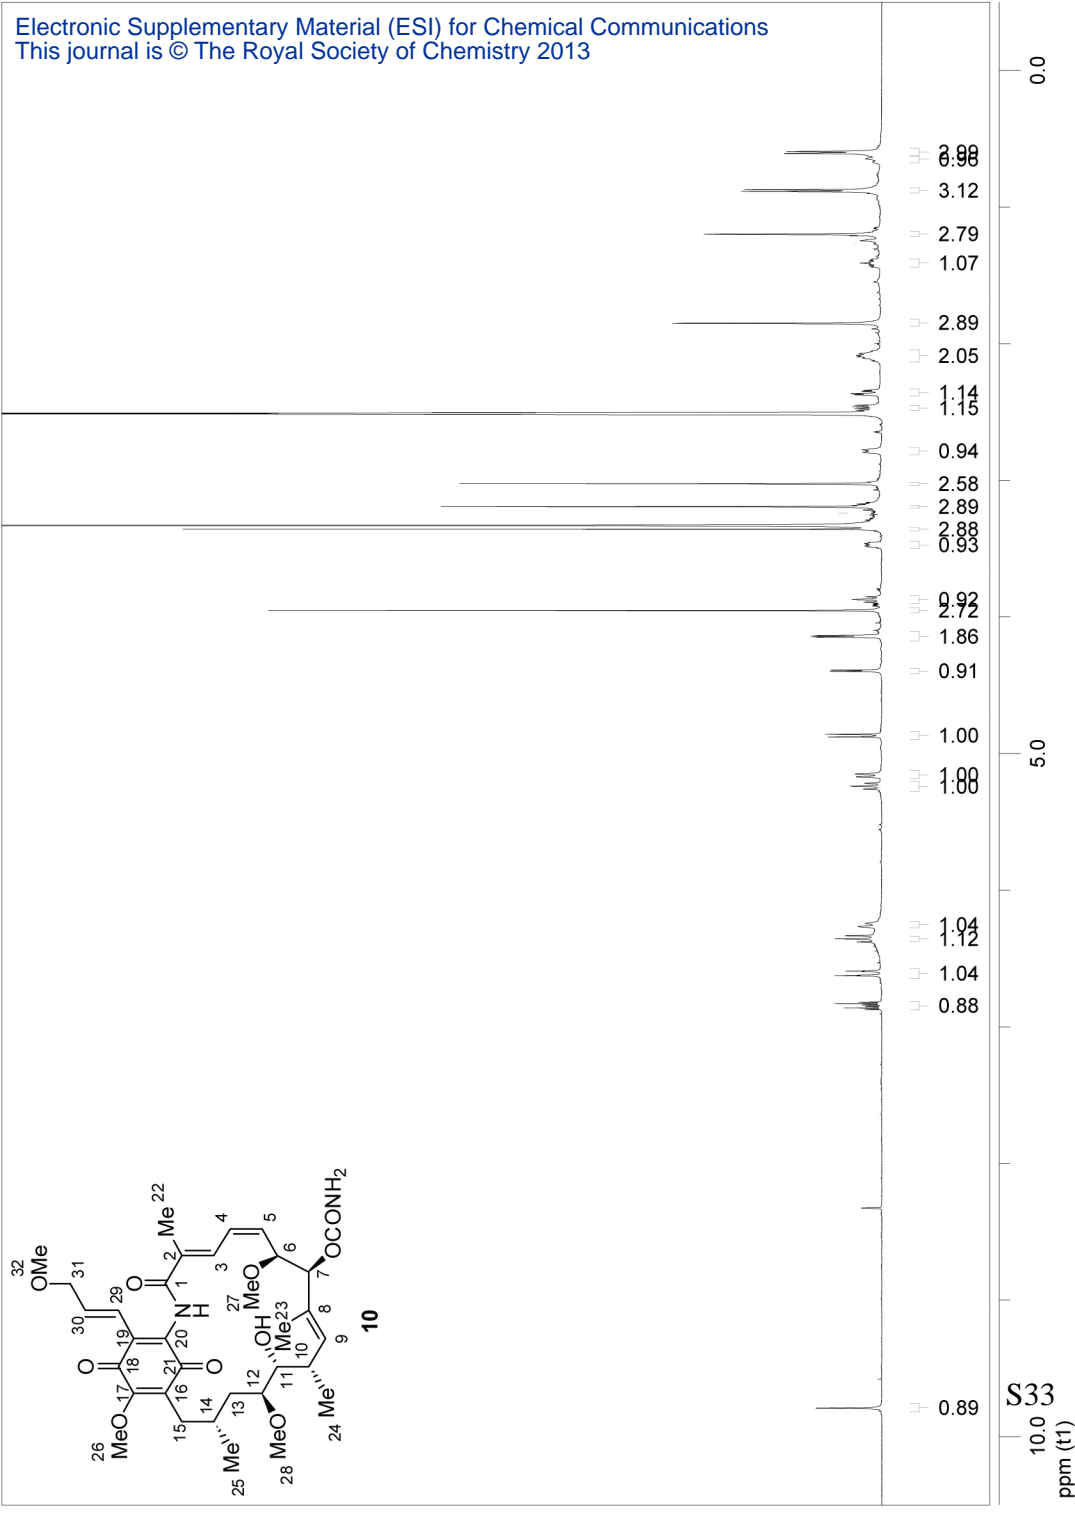

34.8  
30.5  
29.4  
28.4  
18.7  
18.5  
13.8  
11.3

79.9  
79.5  
74.3  
72.5  
71.5  
60.8  
57.6  
56.6  
55.4

156.5  
155.7  
138.5  
138.0  
137.7  
134.3  
130.2  
128.7  
128.3  
128.2  
124.5  
122.8  
119.7

183.7  
181.8  
173.4

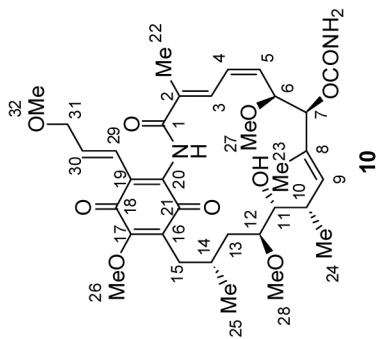

S34

200  
ppm (t1)

150

100

50

0

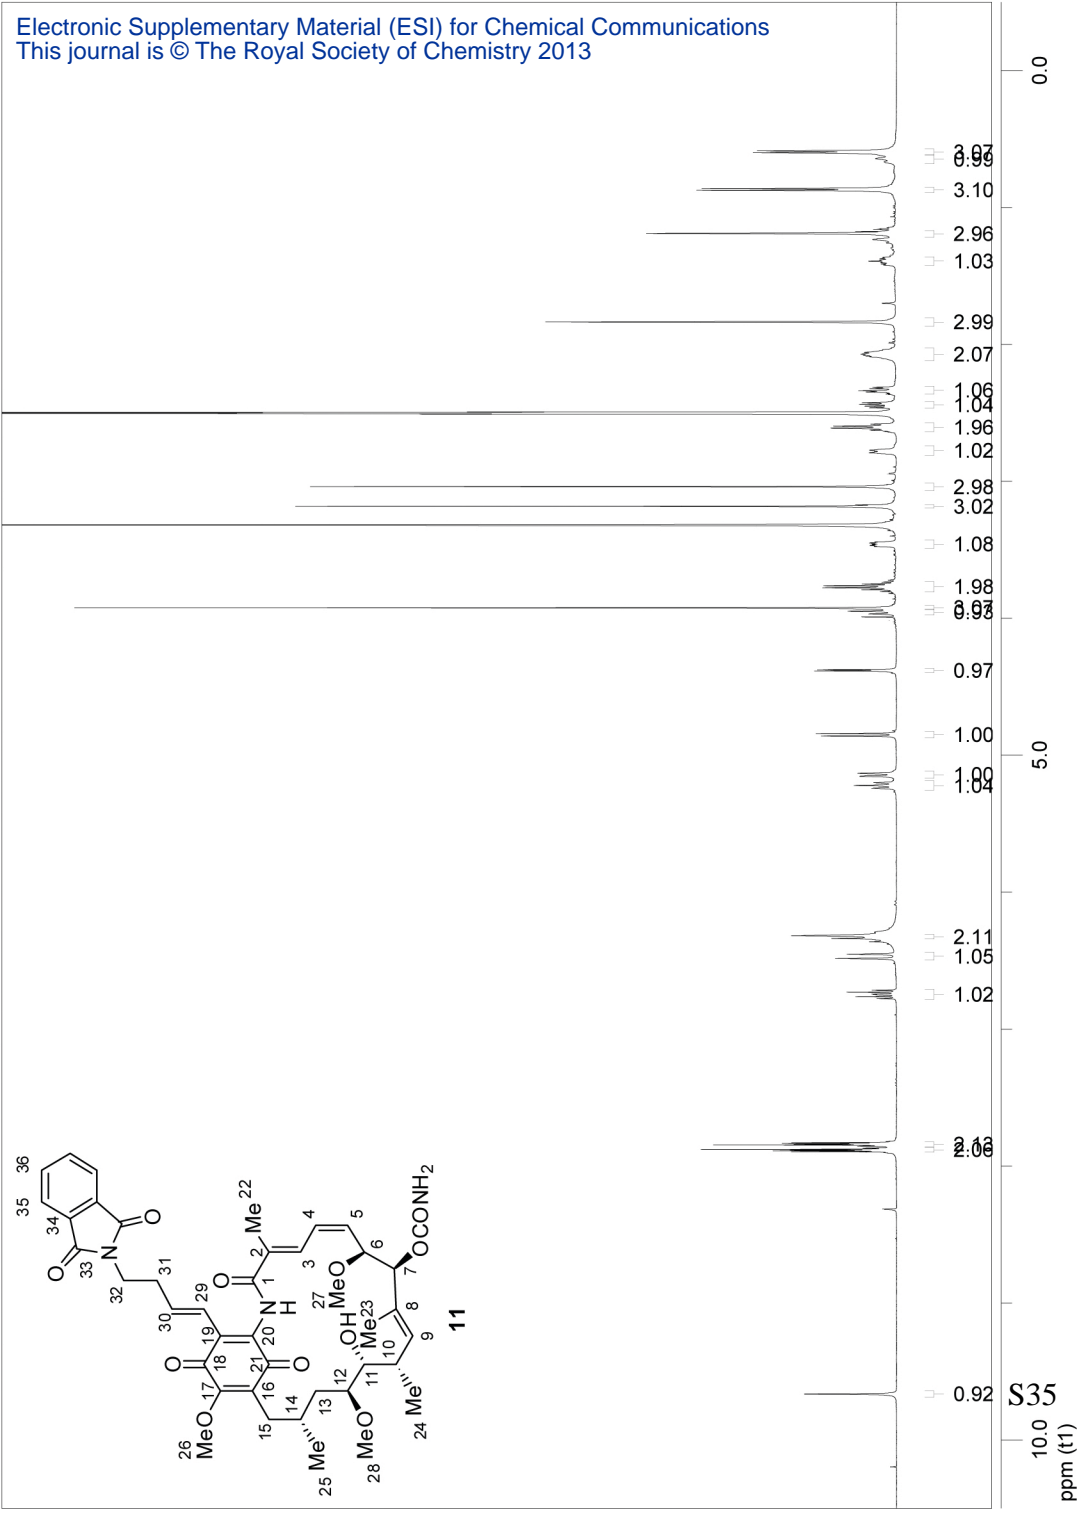

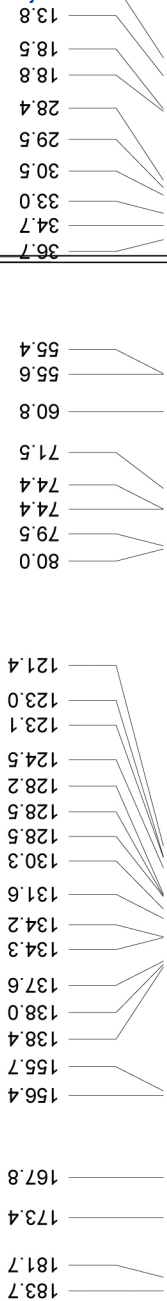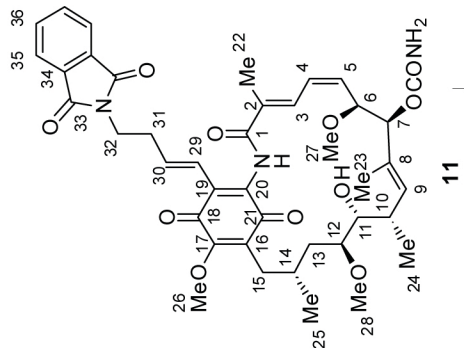



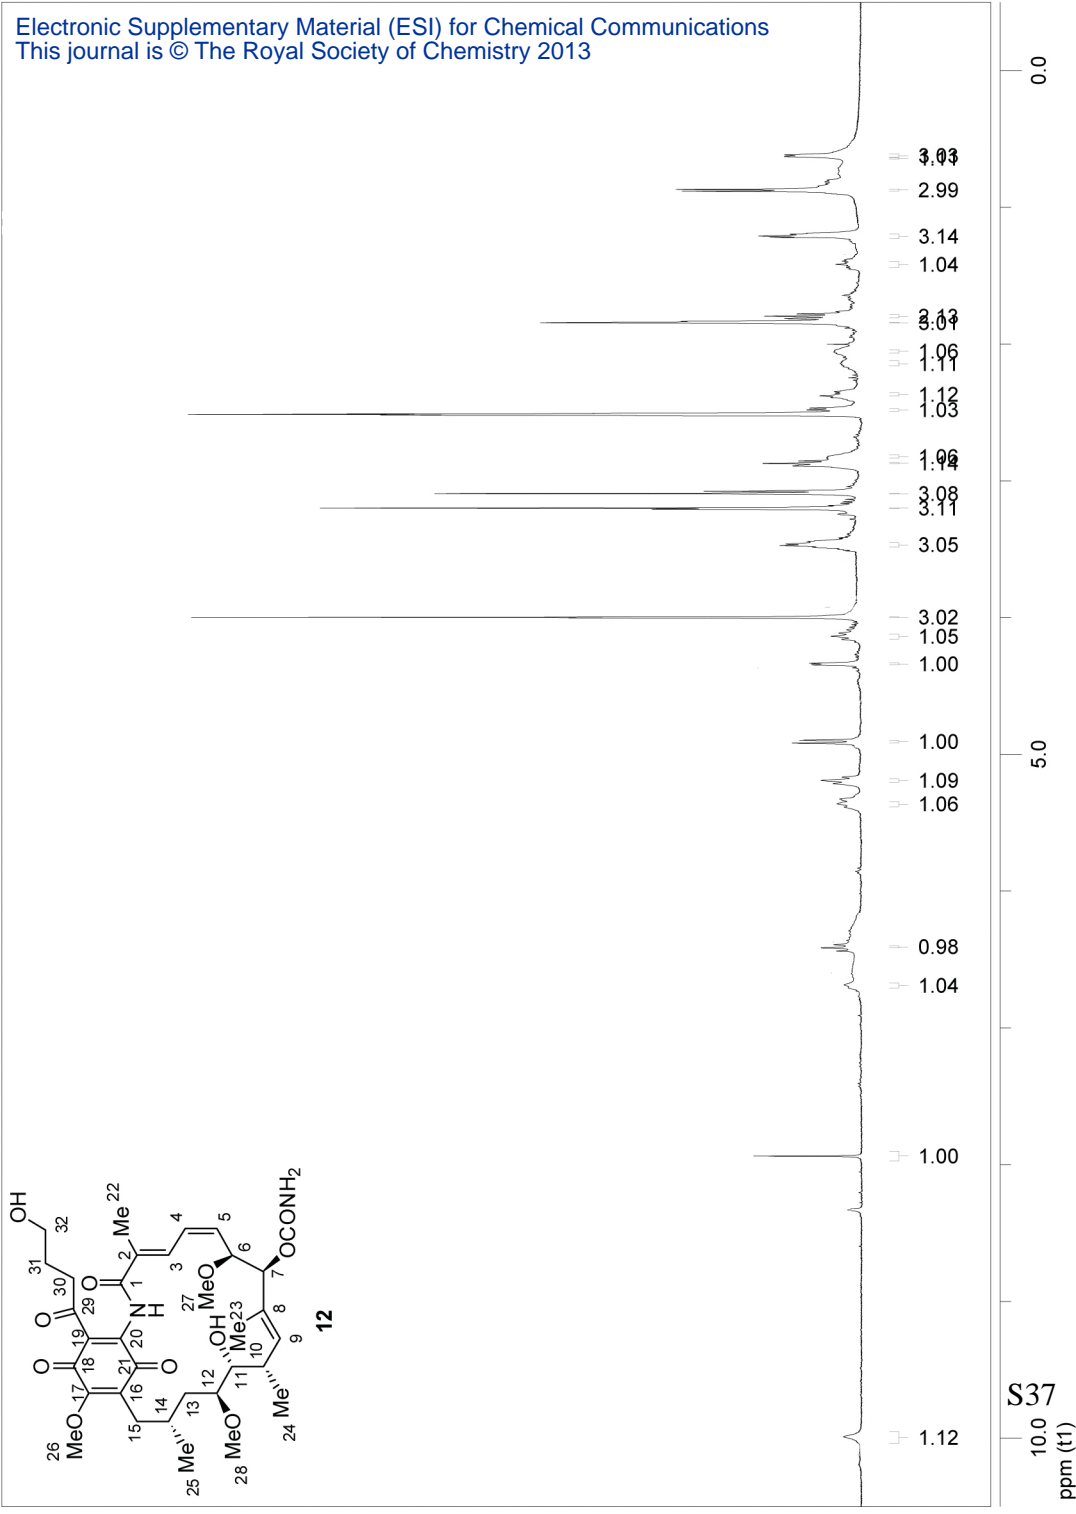

S37

10.0  
ppm (τ<sub>11</sub>)

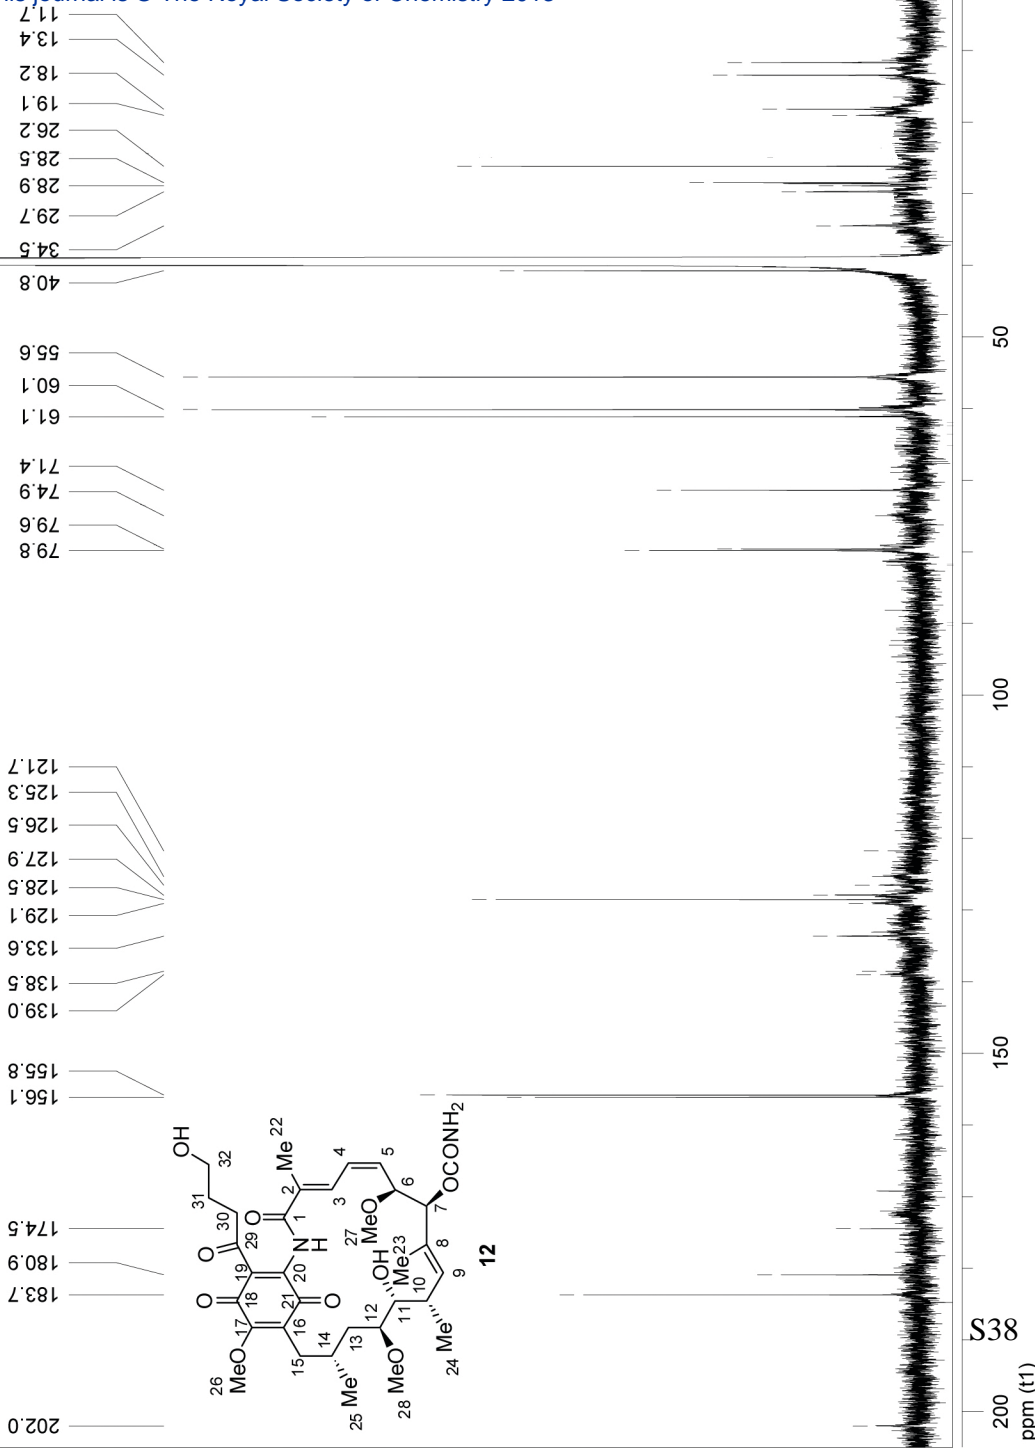

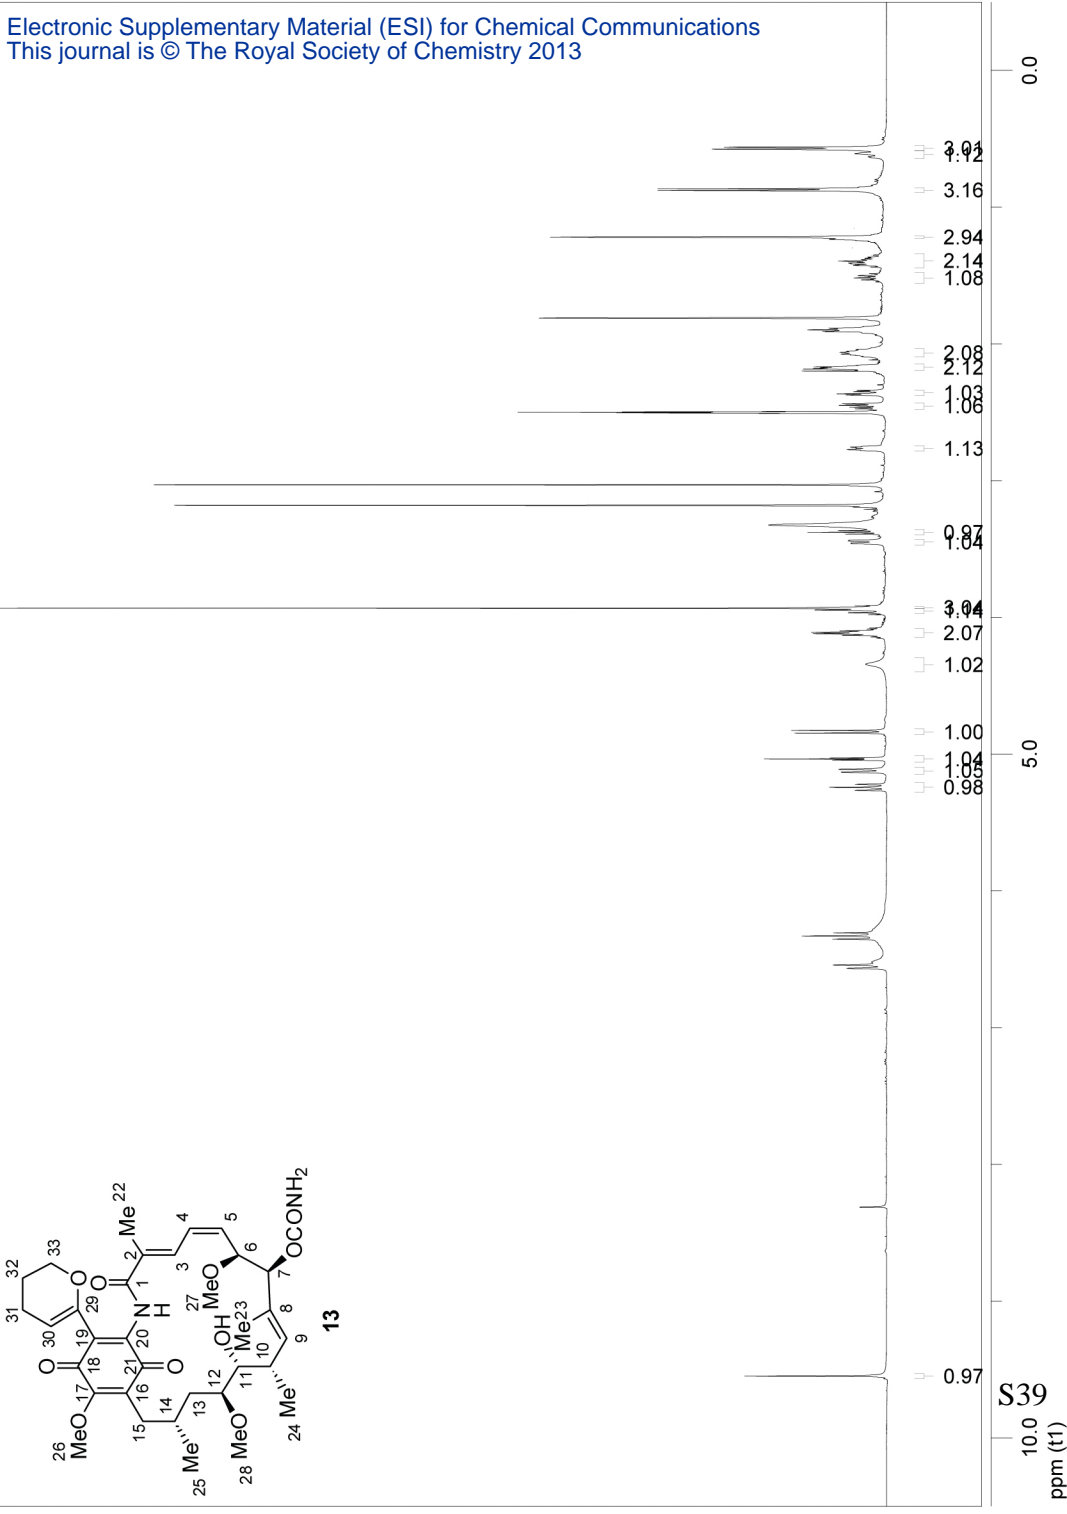

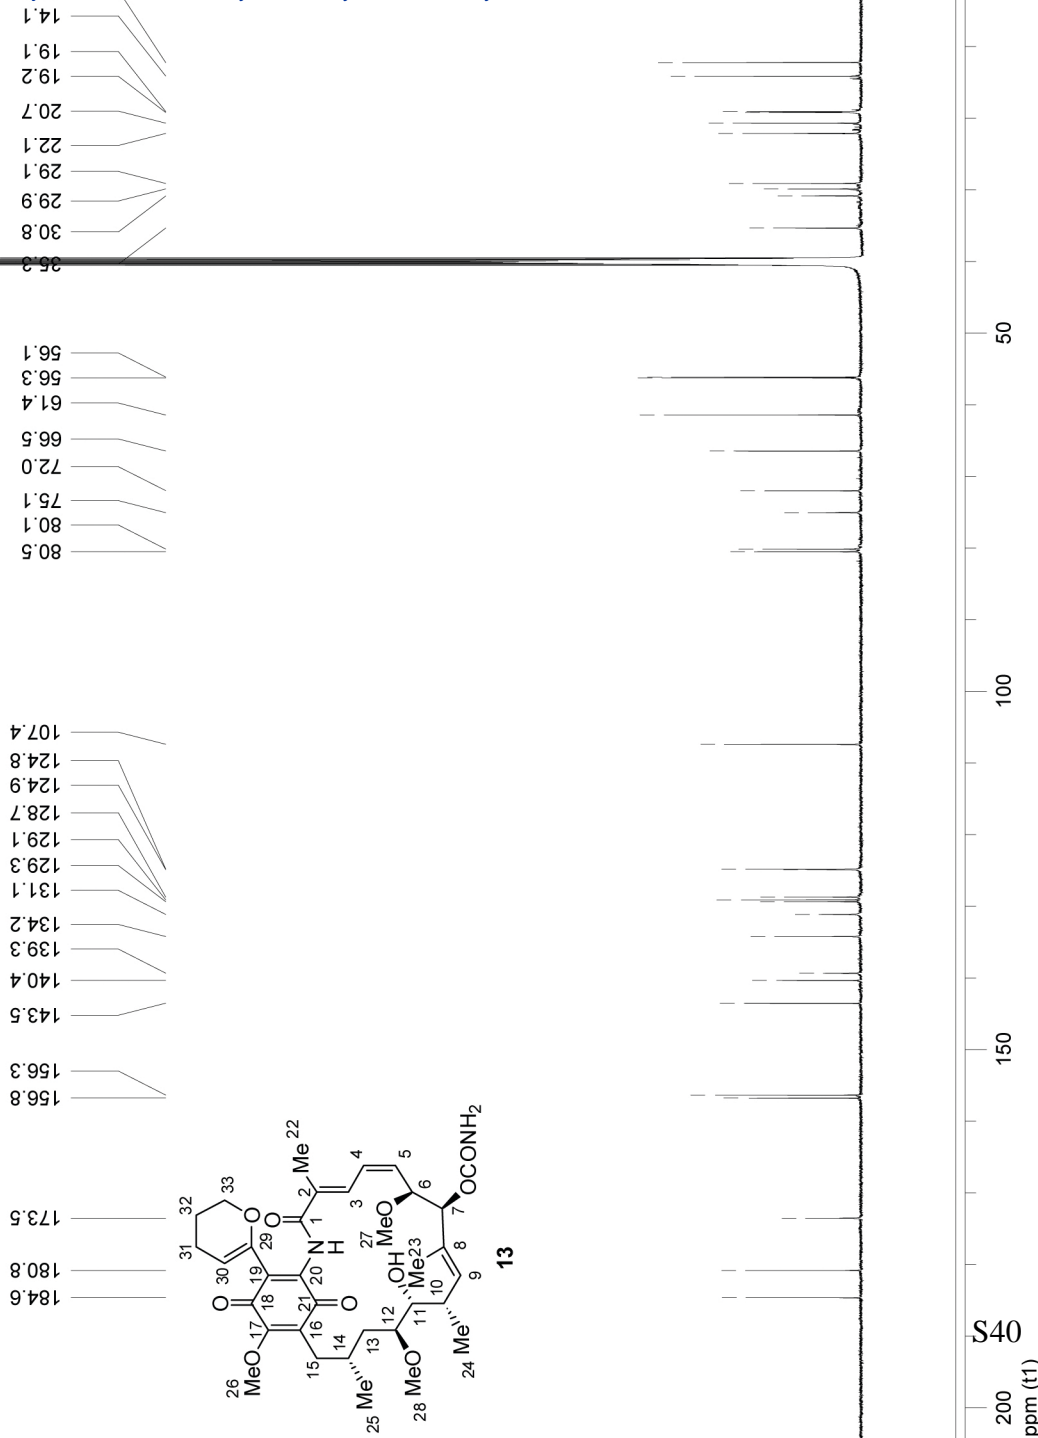

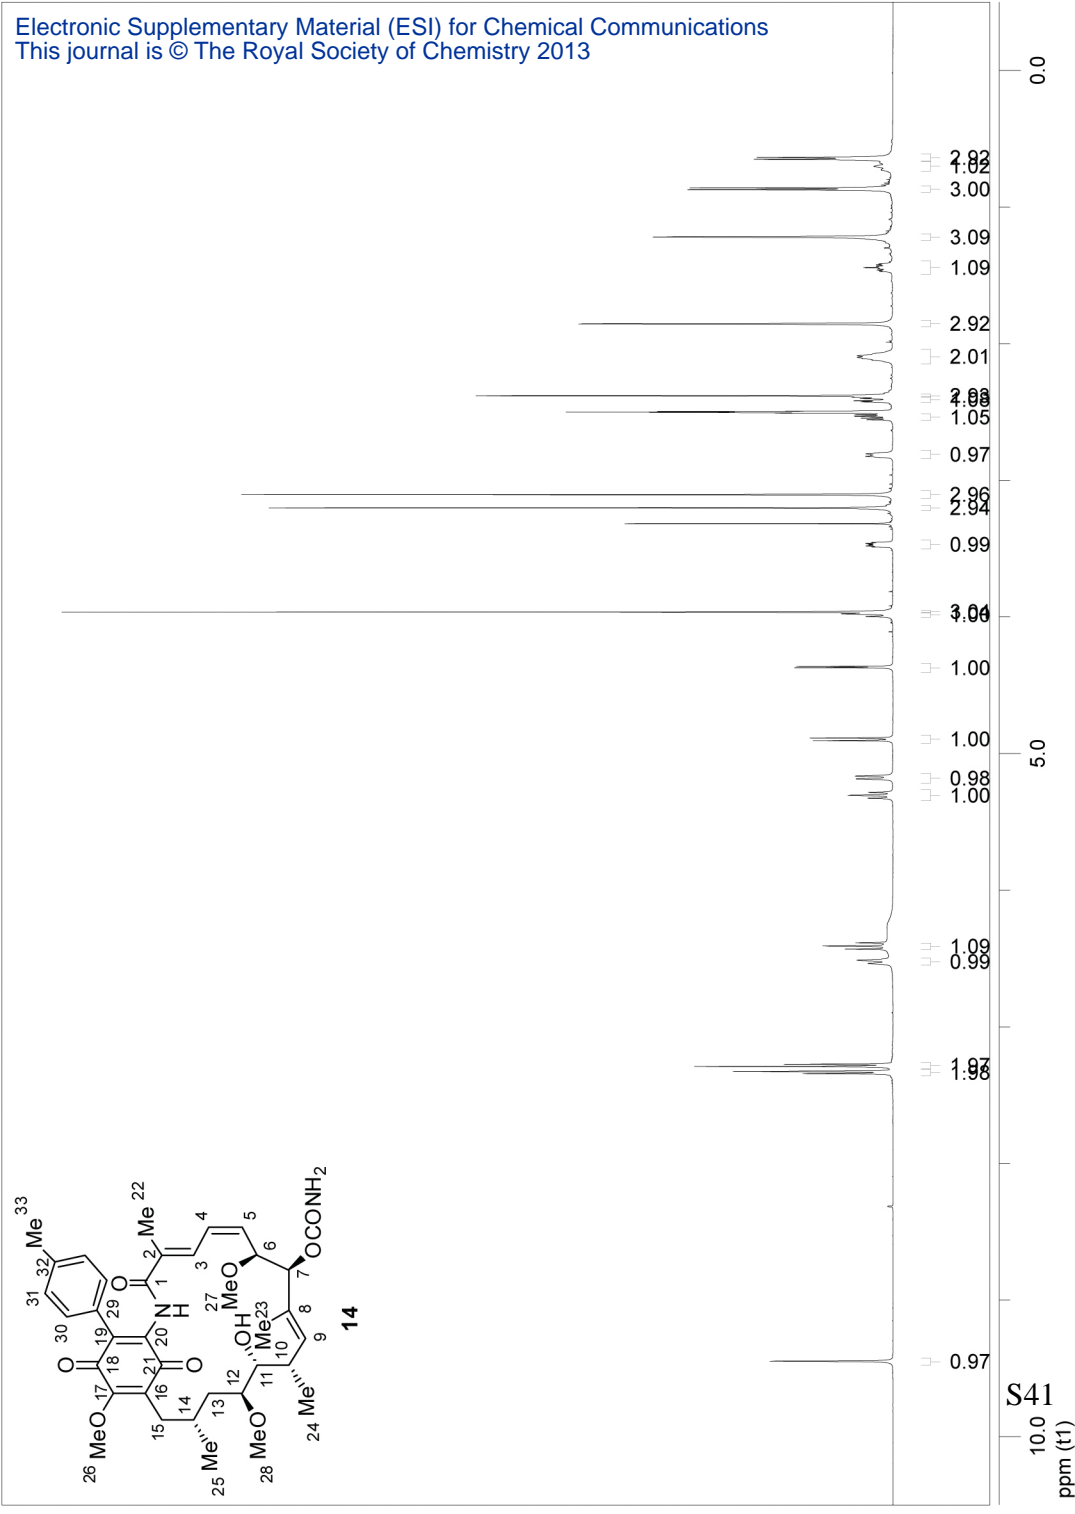

S41

10.0  
ppm (t1)

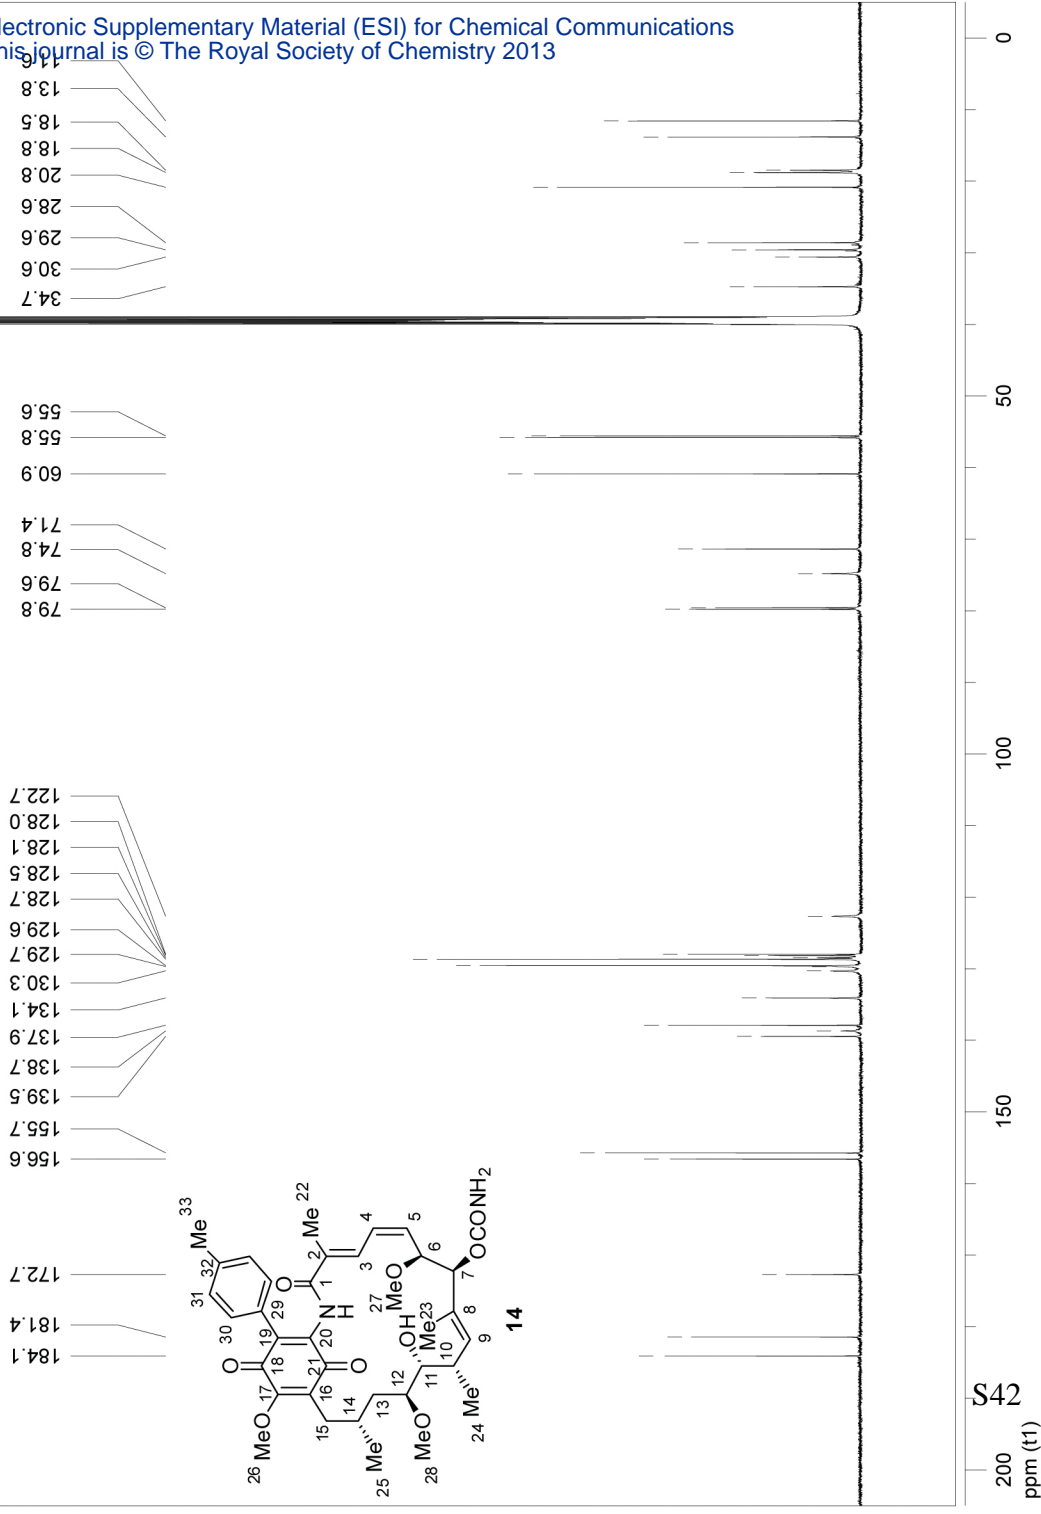

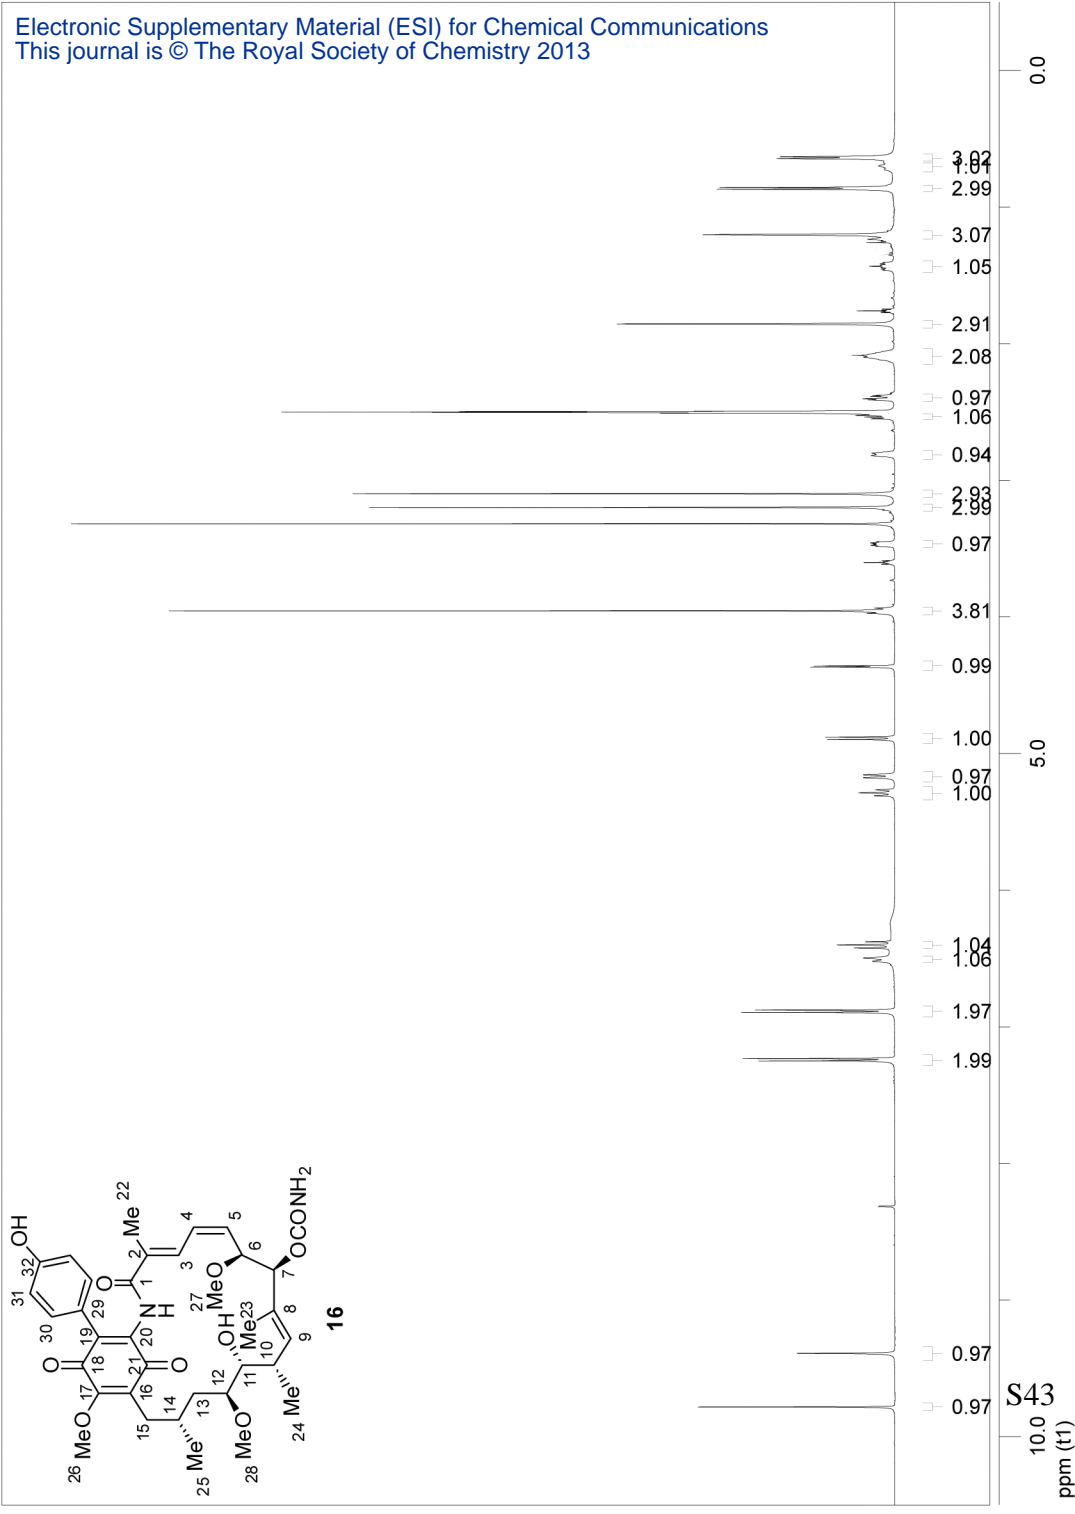

11.6  
13.8  
18.5  
18.8  
28.6  
29.6  
30.6  
34.7

55.6  
55.8  
60.8  
71.4  
74.7  
79.6  
79.8

114.9  
121.2  
122.5  
128.2  
128.5  
128.6  
130.2  
131.3  
134.1  
138.6  
138.7  
155.7  
156.5  
157.7

172.7  
181.7  
184.1

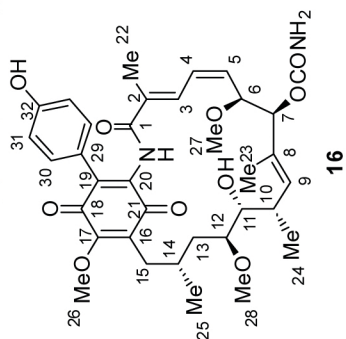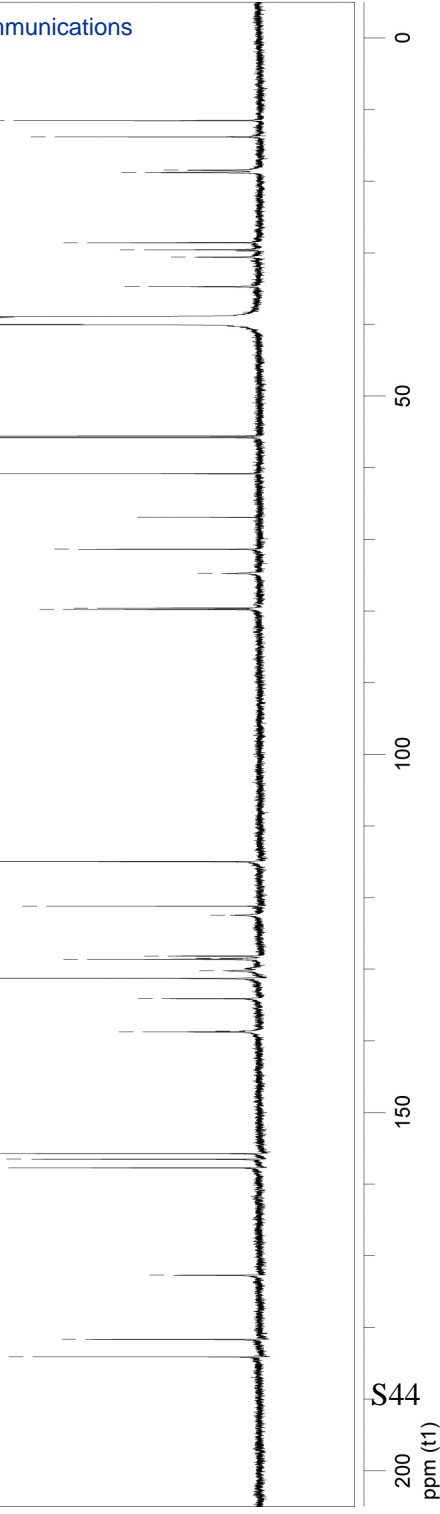



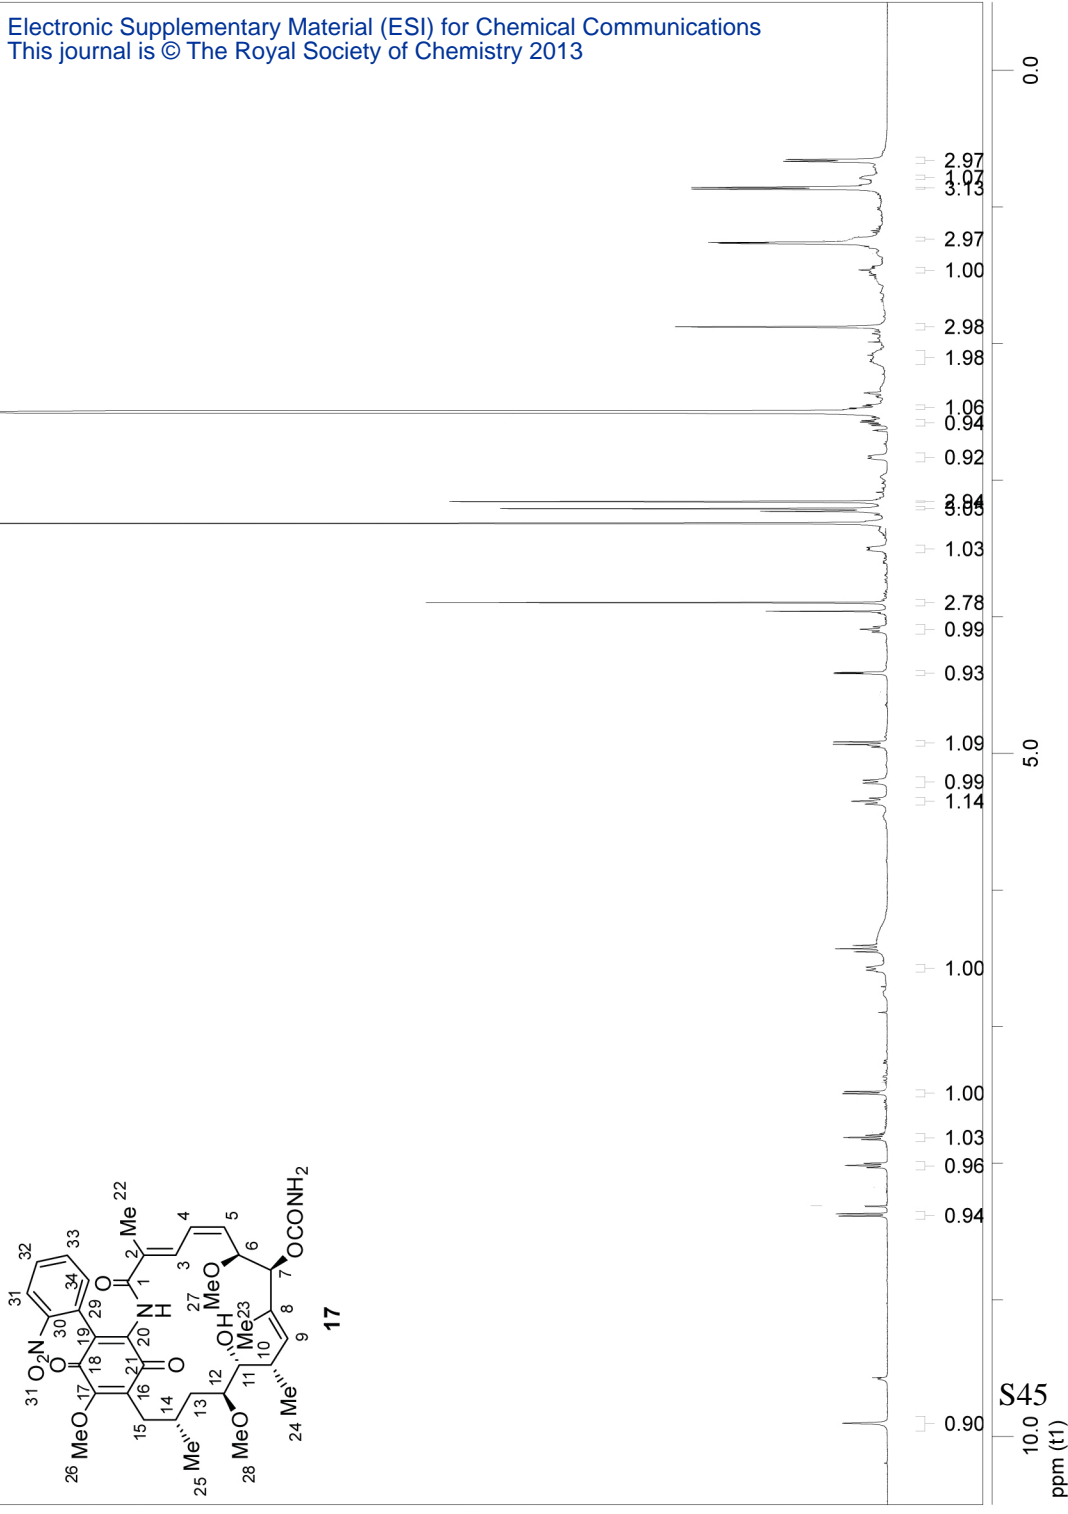

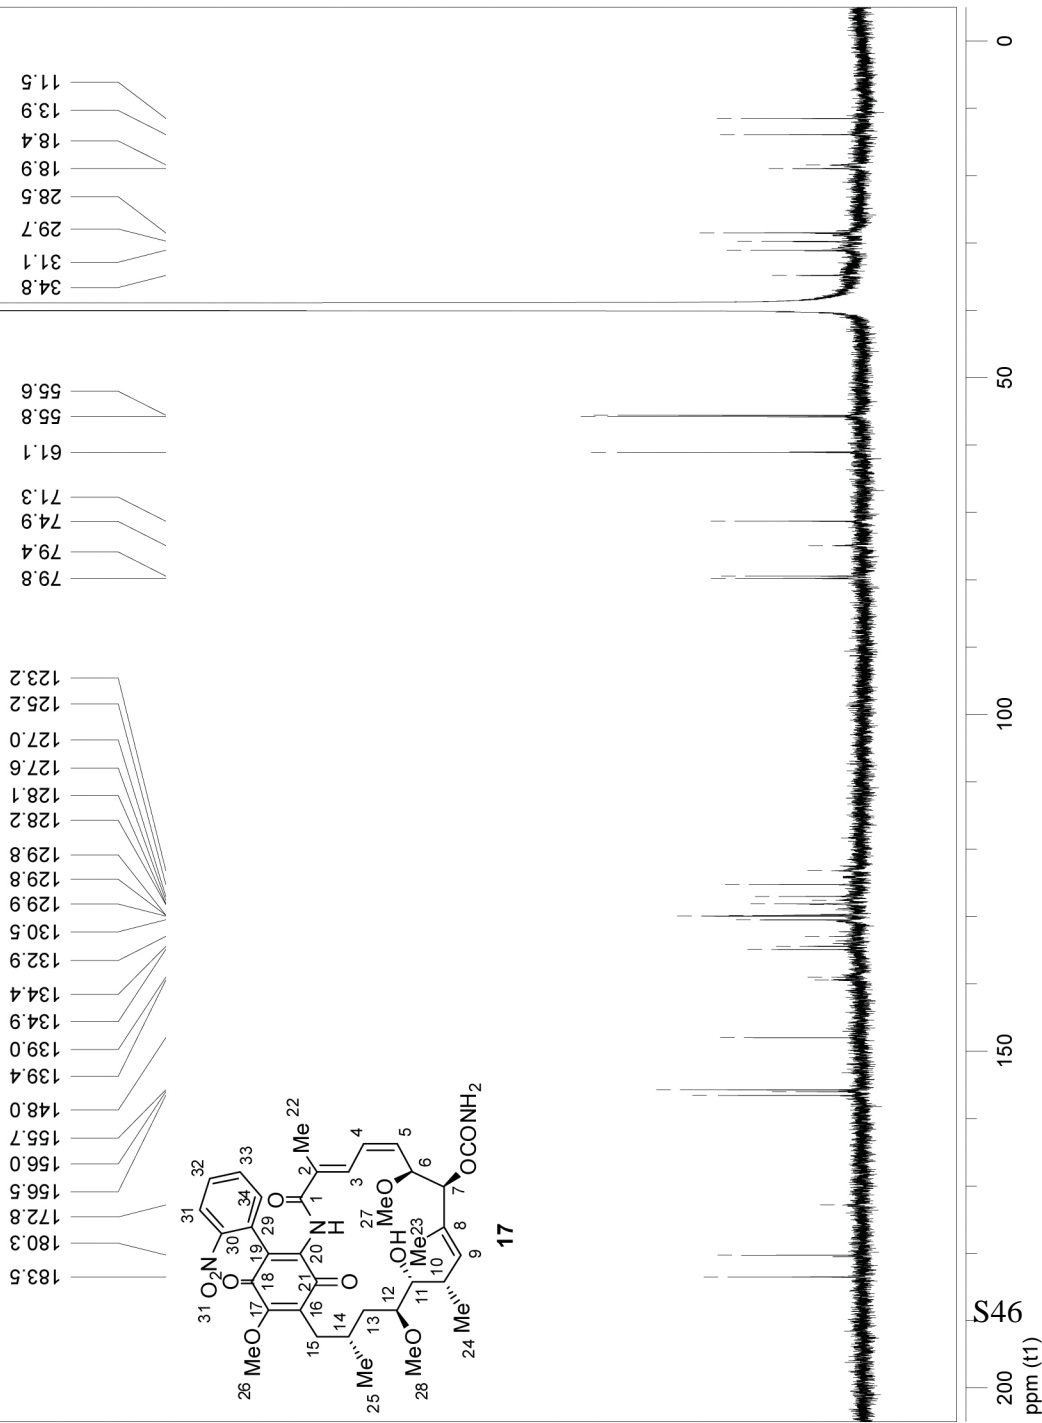

S46

200  
ppm (t1)

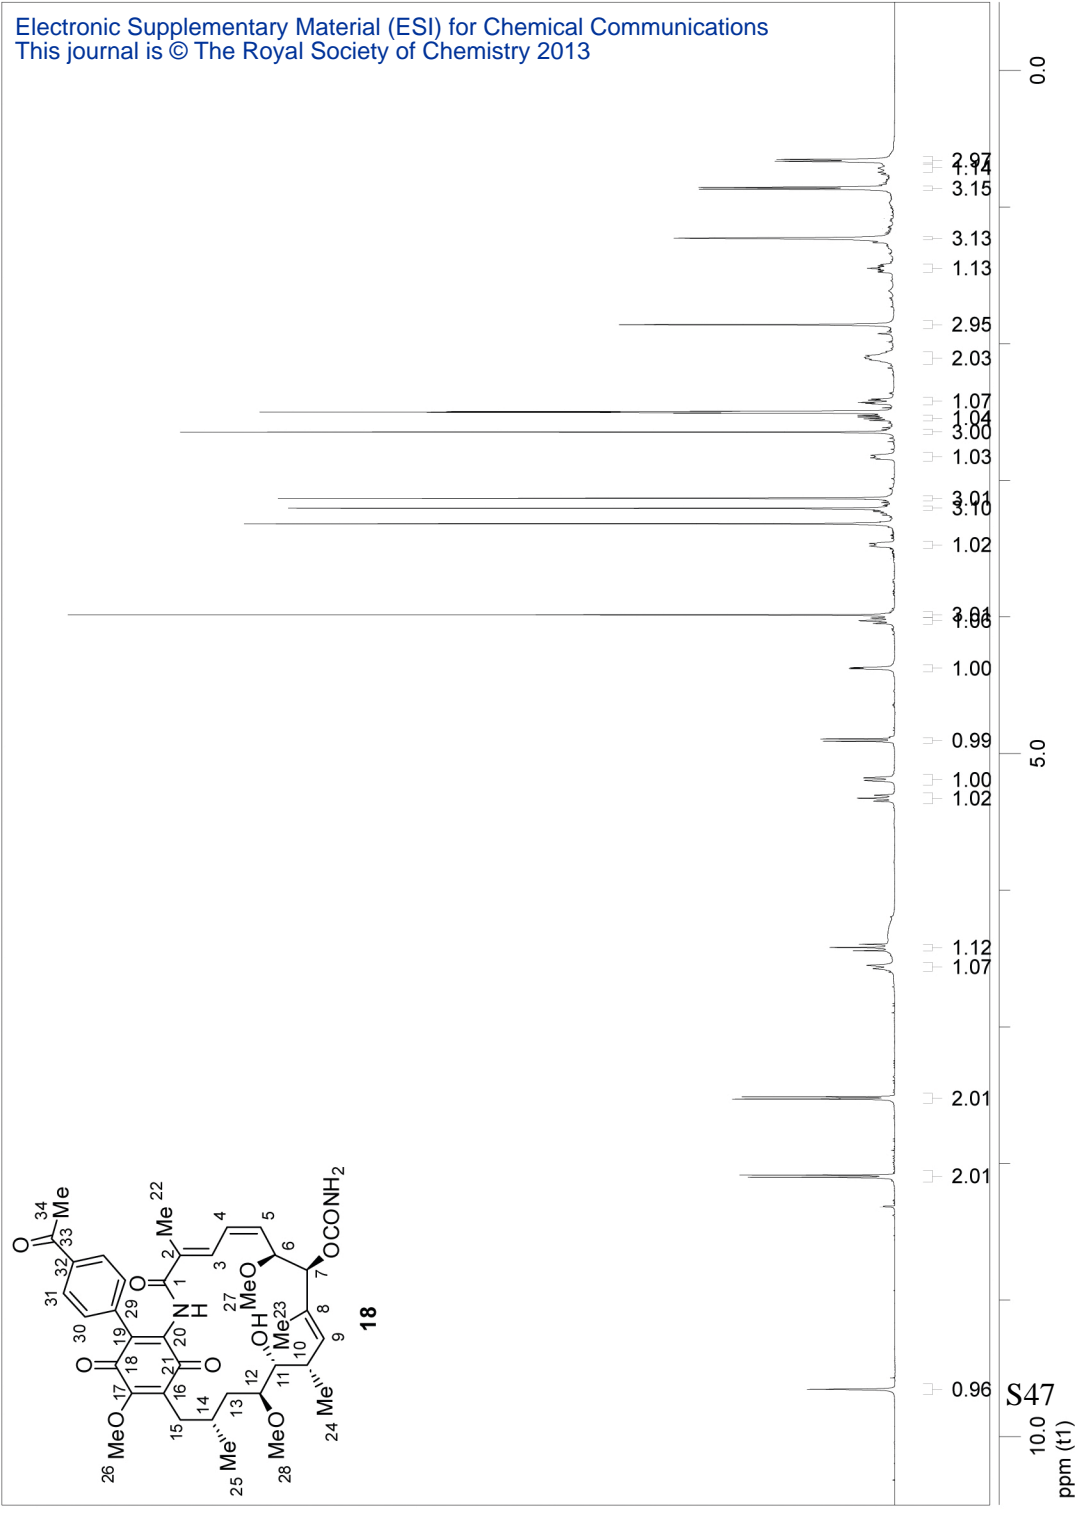

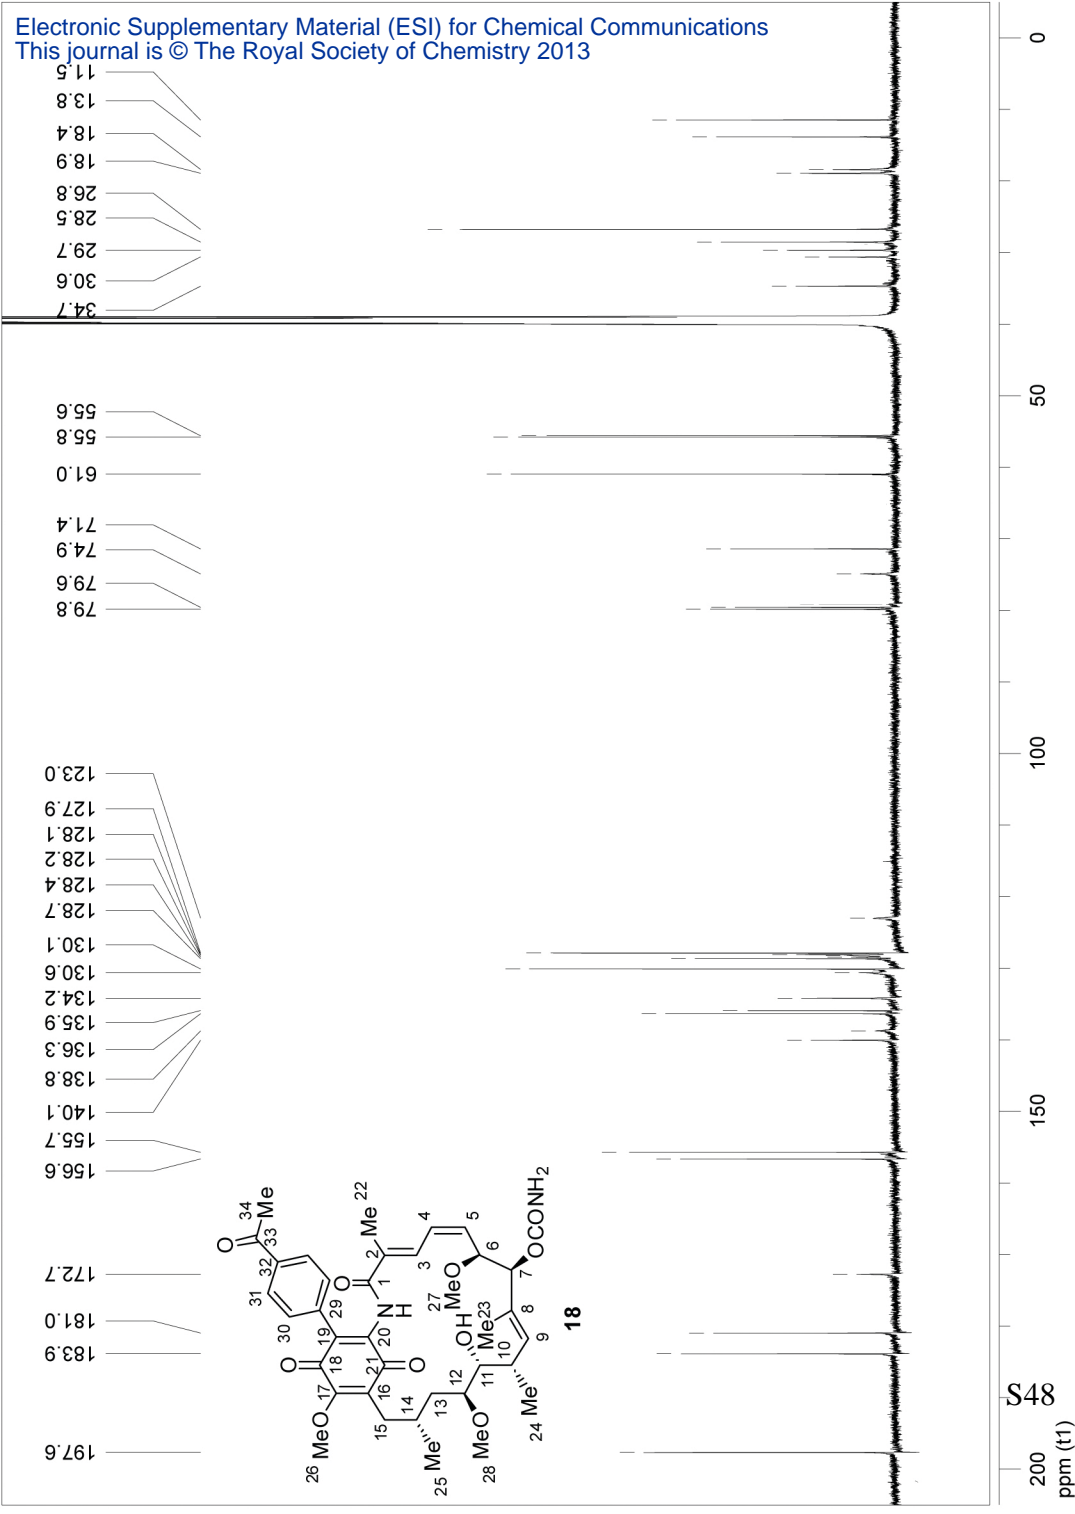

Supplement: c3cc43457e_2.pdf [file c3cc43457e_2.pdf]
